# Supplementary material for: Hofmeister effects on protein stability are dependent on the nature of the unfolded state
Source: Royal Society of Chemistry journal article supplement (doi:10.1039/d1cp02477a), 2021-01-01
Supplement: d1cp02477a1.pdf [file d1cp02477a1.pdf]

**ELECTRONIC SUPPLEMENTARY INFORMATION (ESI)**

# **Hofmeister Effects on Protein Stability are dependent on the Nature of the Unfolded State**

Sara S. Ribeiro<sup>a‡</sup>, Tarsila G. Castro<sup>b</sup>, Cláudio M. Gomes<sup>c</sup>, João C. Marcos<sup>a\*</sup>

<sup>a</sup> *Centre of Chemistry, University of Minho, Campus de Gualtar, Braga, Portugal*

<sup>b</sup> *Centre of Biological Engineering, University of Minho, Campus de Gualtar, Braga, Portugal*

<sup>c</sup> *Biosystems and Integrative Sciences Institute, Faculdade de Ciências and Departamento de Química e Bioquímica, Universidade de Lisboa, 1749-016 Lisboa, Portugal*

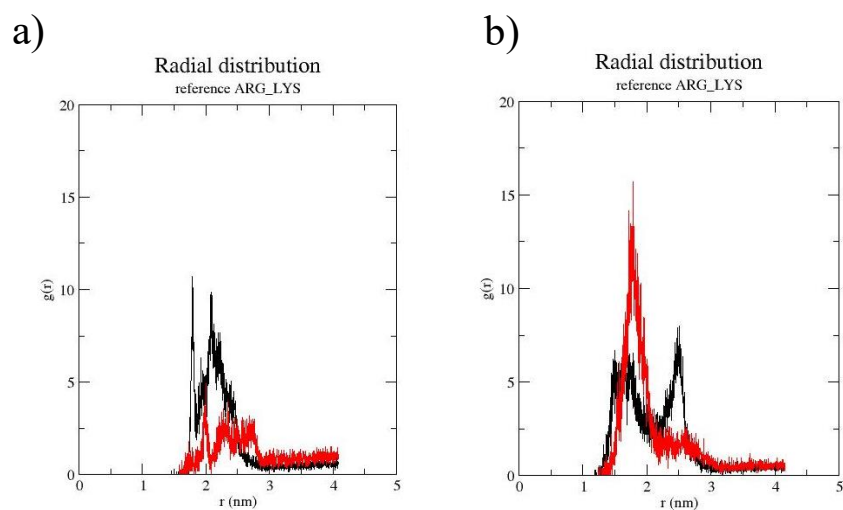

**Figure S1.** Radial distribution functions of dihydrogen phosphate  $[H_2PO_4]^-$  (black line) and monohydrogen phosphate  $[HPO_4]^{2-}$  (red line) in the vicinity of positive side (lysine (Lys) and arginine (Arg)) chain residues for the native (a) and thermally (b) unfolded states during 50 ns of MD simulation.

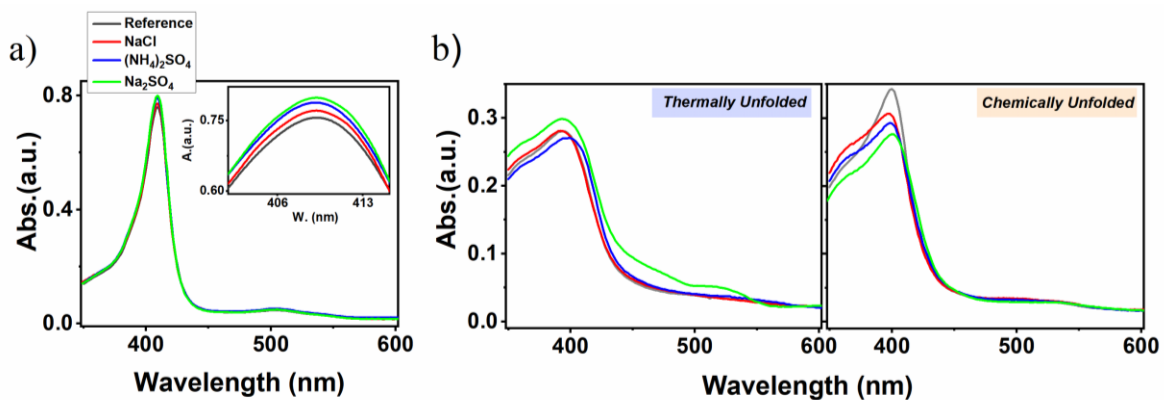

**Figure S2.** Spectra of heme group in 0.05 M phosphate buffer pH 7 (or reference) and in the presence of each studied salt at 0.3 M for the folded (a), thermal and chemically (b) unfolded myoglobin.

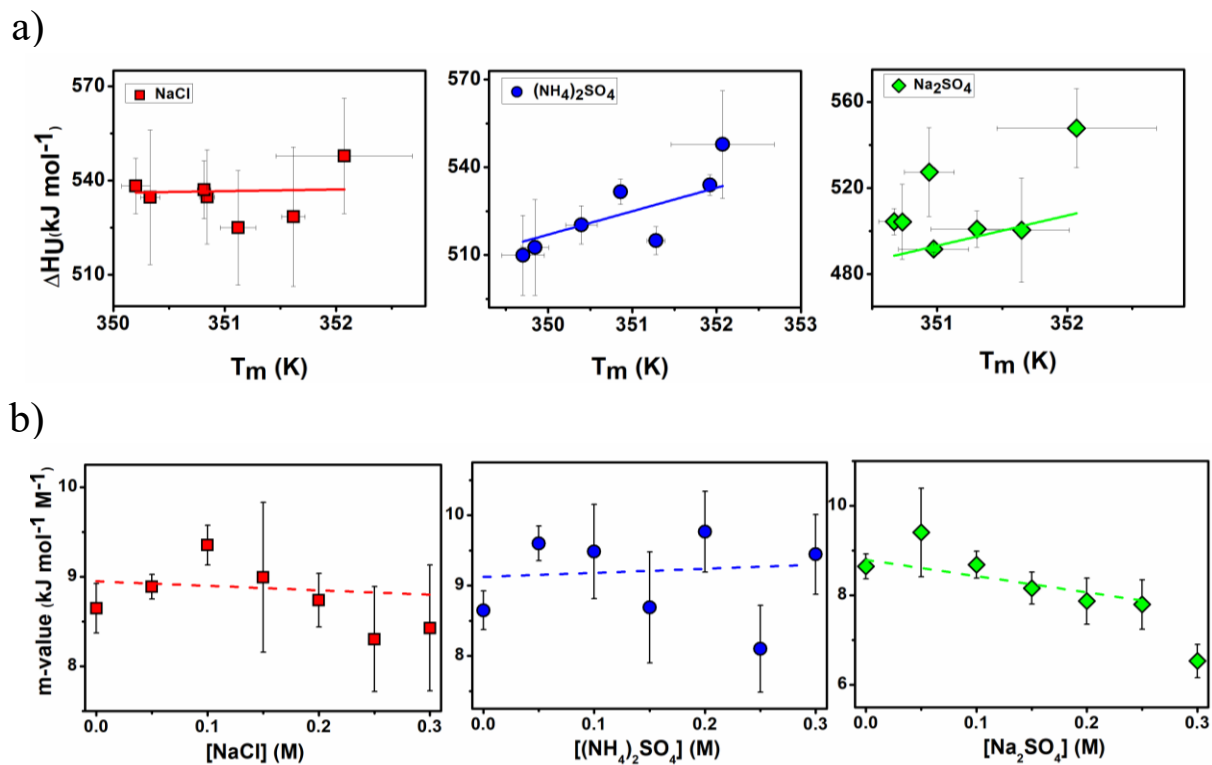

**Figure S3.** (a)  $\Delta H_U$  as function of  $T_m$  plots for each salt obtained from the myoglobin thermal denaturation. The slope of these plots defines  $\Delta C_p^*$ , the change in the heat capacity of unfolding induced by the salt at 0.3 M. No linear fit was successful ( $r^2$  were all below 0.157). (b) m-values determined from chemical denaturation of myoglobin in the presence of each salt for the different concentrations. Similar to thermal unfolding, no linear relation was found, with all  $r^2$  below 0.562.

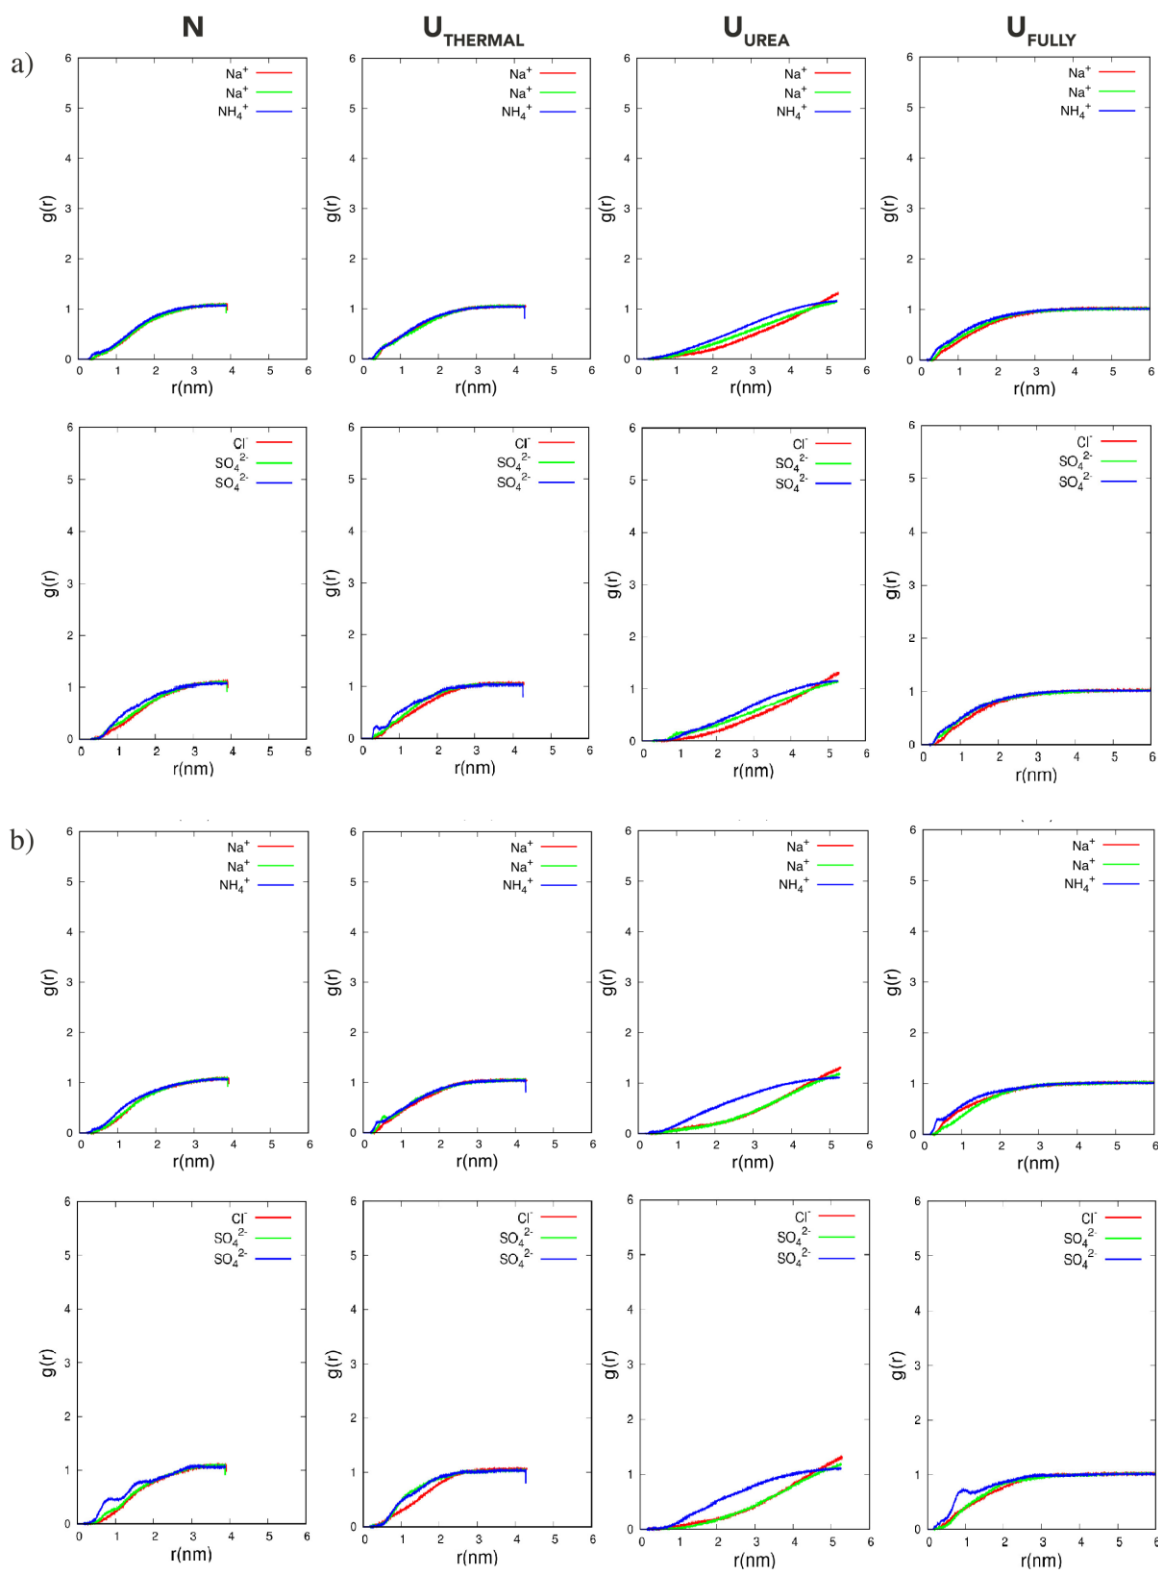

**Figure S4.** Radial distribution functions of cations ( $\text{Na}^+$  and  $\text{NH}_4^+$ ) and anions ( $\text{Cl}^-$  and  $\text{SO}_4^{2-}$ ) in the vicinity of aliphatic (a) and aromatic (b) side-chains of myoglobin during the last 60ns of MD simulation in the four different conformations investigated. Red refers to  $\text{NaCl}$ , green to  $\text{Na}_2\text{SO}_4$  and blue to  $(\text{NH}_4)_2\text{SO}_4$ .

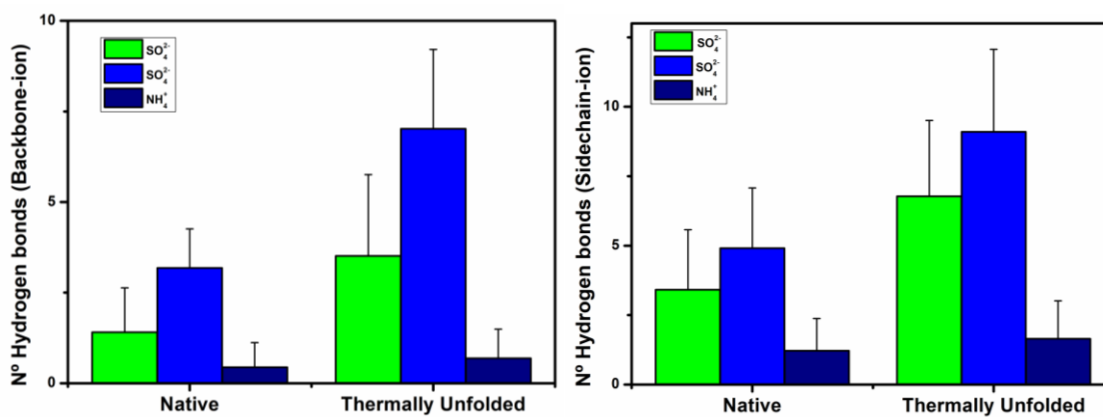

**Figure S5.** Average number of hydrogen bonds between myoglobin backbone (**left**) or sidechain (**right**) and  $\text{SO}_4^{2-}$  (green from  $\text{Na}_2\text{SO}_4$ ) (blue from  $(\text{NH}_4)_2\text{SO}_4$ ) or  $\text{NH}_4^+$  during the last 60 ns of simulation.

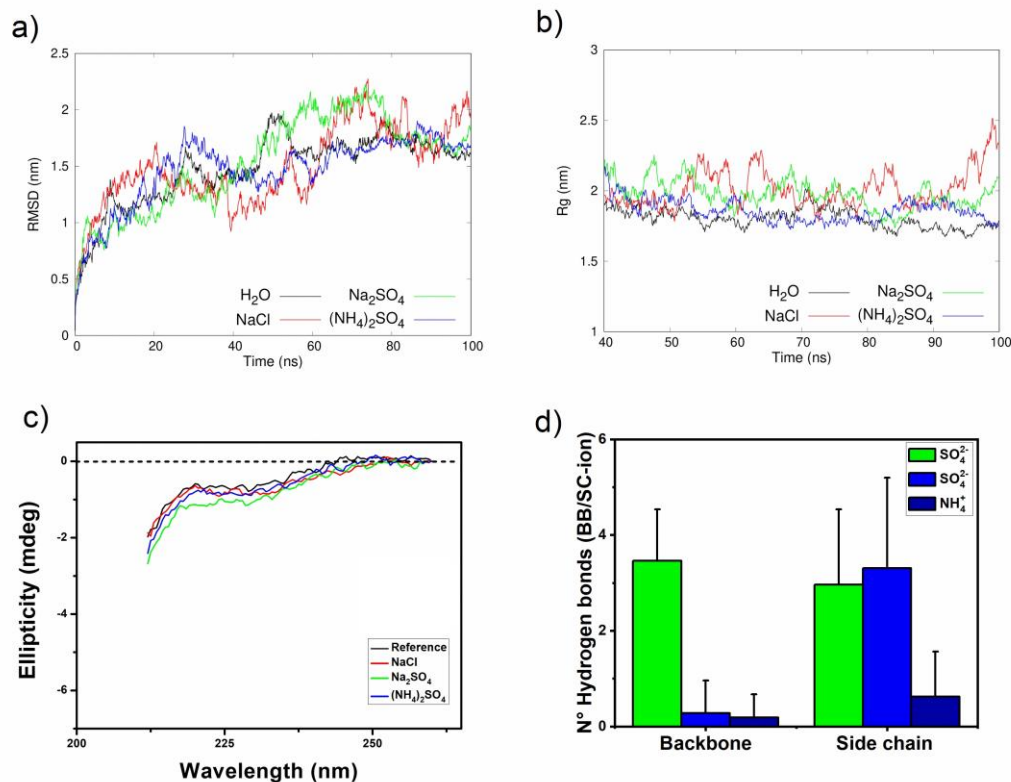

**Figure S6.** (a) Root mean square deviation (RMSD) of chemically unfolded myoglobin in water and in the presence of each salt at 0.3 M over the 100 ns of simulation. (b) Average radius of gyration (Rg) of chemically unfolded myoglobin during the last 60 ns of simulation in the absence or in the presence of each salt. (c) Far-UV spectra of urea-unfolded myoglobin with NaCl, (NH<sub>4</sub>)<sub>2</sub>SO<sub>4</sub> and Na<sub>2</sub>SO<sub>4</sub> at 0.3 M. (d) Average number of hydrogen bonds between myoglobin backbone/sidechain and SO<sub>4</sub><sup>2-</sup> (green from Na<sub>2</sub>SO<sub>4</sub>) (blue from (NH<sub>4</sub>)<sub>2</sub>SO<sub>4</sub>) or NH<sub>4</sub><sup>+</sup> in U<sub>urea</sub> during the last 60 ns of simulation.

**Table S1. Reversibility of myoglobin thermal unfolding calculated for each salt condition.**

|                          | [Salt] (M) | Buffer | NaCl | Na <sub>2</sub> SO <sub>4</sub> | (NH <sub>4</sub> ) <sub>2</sub> SO <sub>4</sub> |
|--------------------------|------------|--------|------|---------------------------------|-------------------------------------------------|
| <i>Reversibility (%)</i> | 0.05       |        | 65.6 | 65.3                            | 71.2                                            |
|                          | 0.1        |        | 70.2 | 70.0                            | 77.6                                            |
|                          | 0.15       | 69.3   | 71.0 | 70.5                            | 75.0                                            |
|                          | 0.2        |        | 70.2 | 65.5                            | 69.9                                            |
|                          | 0.25       |        | 72.5 | 63.9                            | 62.0                                            |
|                          | 0.3        |        | 72.4 | 62.7                            | 62.1                                            |

**Table S2. Reversibility of chemical denaturation experiments in buffer and at 0.3 M of all salts.**

|                          | Buffer | NaCl | Na <sub>2</sub> SO <sub>4</sub> | (NH <sub>4</sub> ) <sub>2</sub> SO <sub>4</sub> |
|--------------------------|--------|------|---------------------------------|-------------------------------------------------|
| <i>Reversibility (%)</i> | 80.0   | 71.3 | 79.5                            | 77.8                                            |

**Table S3. Number of ions and water molecules used in MD simulations.**

|                            | System                                          | Water | Cation | Anion | Urea | Total N° of molecules* | Final volume (nm <sup>3</sup> ) |
|----------------------------|-------------------------------------------------|-------|--------|-------|------|------------------------|---------------------------------|
| <i>N</i>                   | Water                                           | 10804 | 2      |       |      | 10806                  | 350.90                          |
|                            | NaCl                                            | 10676 | 66     | 64    |      | 10806                  |                                 |
|                            | Na <sub>2</sub> SO <sub>4</sub>                 | 10473 | 130    | 64    |      | 10667                  |                                 |
|                            | (NH <sub>4</sub> ) <sub>2</sub> SO <sub>4</sub> | 10371 | 130    | 64    |      | 10565                  |                                 |
| <i>U<sub>Thermal</sub></i> | Water                                           | 13797 |        |       |      | 13797                  | 404.91                          |
|                            | NaCl                                            | 13637 | 80     | 80    |      | 13797                  |                                 |
|                            | Na <sub>2</sub> SO <sub>4</sub>                 | 13372 | 160    | 80    |      | 13532                  |                                 |
|                            | (NH <sub>4</sub> ) <sub>2</sub> SO <sub>4</sub> | 13208 | 160    | 80    |      | 13448                  |                                 |
| <i>U<sub>Urea</sub></i>    | Water                                           | 15190 |        |       | 3977 | 19167                  | 868.99                          |
|                            | NaCl                                            | 14876 | 157    | 157   | 3977 | 19167                  |                                 |
|                            | Na <sub>2</sub> SO <sub>4</sub>                 | 14462 | 314    | 157   | 3977 | 19090                  |                                 |
|                            | (NH <sub>4</sub> ) <sub>2</sub> SO <sub>4</sub> | 14307 | 314    | 157   | 3977 | 18755                  |                                 |
| <i>U<sub>Fully</sub></i>   | Water                                           | 48456 |        |       |      | 48456                  | 1508.62                         |
|                            | NaCl                                            | 47912 | 272    | 272   |      | 48456                  |                                 |
|                            | Na <sub>2</sub> SO <sub>4</sub>                 | 47040 | 544    | 272   |      | 47856                  |                                 |
|                            | (NH <sub>4</sub> ) <sub>2</sub> SO <sub>4</sub> | 46509 | 544    | 272   |      | 47325                  |                                 |

\*This number of molecules does not include myoglobin



**Table S4.  $T_m$  (K),  $\Delta H_U$  (kJ mol<sup>-1</sup>),  $C_m$  (M) and  $m$ -values (kJ mol<sup>-1</sup> M<sup>-1</sup>) determined for thermal and chemical denaturation with UV-VIS in buffer (or reference) and each salt condition (Average and standard deviation for 3 replica).**

|                       | <i>[Salt] (M)</i> | <i>NaCl</i>    | <i>Na<sub>2</sub>SO<sub>4</sub></i> | <i>(NH<sub>4</sub>)<sub>2</sub>SO<sub>4</sub></i> | <i>Buffer</i>  |
|-----------------------|-------------------|----------------|-------------------------------------|---------------------------------------------------|----------------|
| <i>T<sub>m</sub></i>  | 0.05              | 351.62 ± 0.11  | 351.65 ± 0.37                       | 351.92 ± 0.01                                     |                |
|                       | 0.1               | 351.12 ± 0.16  | 350.97 ± 0.27                       | 351.28 ± 0.10                                     |                |
|                       | 0.15              | 350.84 ± 0.07  | 350.94 ± 0.19                       | 350.86 ± 0.04                                     |                |
|                       | 0.2               | 350.78 ± 0.01  | 350.67 ± 0.12                       | 350.39 ± 0.19                                     | 352.44 ± 0.28  |
|                       | 0.25              | 350.33 ± 0.09  | 350.73 ± 0.06                       | 349.84 ± 0.16                                     |                |
|                       | 0.3               | 350.20 ± 0.13  | 351.31 ± 0.35                       | 349.70 ± 0.25                                     |                |
| <i>ΔH<sub>U</sub></i> | 0.05              | 528.49 ± 22.18 | 515.79 ± 13.16                      | 533.94 ± 3.47                                     |                |
|                       | 0.1               | 524.99 ± 18.20 | 491.62 ± 1.29                       | 514.92 ± 4.74                                     |                |
|                       | 0.15              | 534.80 ± 14.96 | 527.44 ± 20.56                      | 531.61 ± 4.35                                     |                |
|                       | 0.2               | 530.86 ± 3.50  | 504.39 ± 6.13                       | 520.29 ± 6.54                                     | 547.81 ± 18.33 |
|                       | 0.25              | 534.68 ± 21.43 | 504.27 ± 17.43                      | 512.55 ± 16.33                                    |                |
|                       | 0.3               | 538.28 ± 8.77  | 500.95 ± 8.37                       | 509.90 ± 3.47                                     |                |
| <i>C<sub>m</sub></i>  | 0.05              | 5.31 ± 0.03    | 5.30 ± 0.01                         | 5.22 ± 0.02                                       |                |
|                       | 0.1               | 5.16 ± 0.01    | 5.35 ± 0.05                         | 5.13 ± 0.03                                       |                |
|                       | 0.15              | 5.12 ± 0.01    | 5.63 ± 0.04                         | 5.32 ± 0.03                                       |                |
|                       | 0.2               | 5.13 ± 0.03    | 5.66 ± 0.05                         | 5.39 ± 0.01                                       | 5.48 ± 0.02    |
|                       | 0.25              | 5.14 ± 0.01    | 5.89 ± 0.03                         | 5.40 ± 0.02                                       |                |
|                       | 0.3               | 5.13 ± 0.03    | 5.88 ± 0.02                         | 5.54 ± 0.04                                       |                |
| <i>m</i> -value       | 0.05              | 8.89 ± 0.14    | 9.41 ± 0.99                         | 9.60 ± 0.25                                       |                |
|                       | 0.1               | 9.35 ± 0.22    | 8.69 ± 0.30                         | 9.48 ± 0.67                                       |                |
|                       | 0.15              | 8.99 ± 0.84    | 8.16 ± 0.36                         | 8.69 ± 0.79                                       | 8.65 ± 0.28    |
|                       | 0.2               | 8.74 ± 0.30    | 7.87 ± 0.51                         | 9.77 ± 0.58                                       |                |
|                       | 0.25              | 8.30 ± 0.59    | 7.80 ± 0.55                         | 8.10 ± 0.62                                       |                |
|                       | 0.3               | 8.43 ± 0.70    | 6.53 ± 0.37                         | 9.44 ± 0.57                                       |                |

**Table S5. Linear fitted values determined for  $\Delta\Delta G_U$  (Salt 1- Salt2) vs salt concentration plots (see Fig. 3a, main text).**

|                           |                                                                                   | <i>Slope</i> | <i>r<sup>2</sup></i> |
|---------------------------|-----------------------------------------------------------------------------------|--------------|----------------------|
| <i>Thermal Unfolding</i>  | Na <sub>2</sub> SO <sub>4</sub> – NaCl                                            | 1.29 ± 0.29  | 0.856                |
|                           | Na <sub>2</sub> SO <sub>4</sub> – (NH <sub>4</sub> ) <sub>2</sub> SO <sub>4</sub> | 2.16 ± 0.27  | 0.928                |
| <i>Chemical Unfolding</i> | Na <sub>2</sub> SO <sub>4</sub> – NaCl                                            | 5.69 ± 0.81  | 0.941                |
|                           | Na <sub>2</sub> SO <sub>4</sub> – (NH <sub>4</sub> ) <sub>2</sub> SO <sub>4</sub> | 2.94 ± 0.66  | 0.759                |
